# Supplementary material for: Adopting, implementing, and assimilating heath and social care innovations coproduced with structurally vulnerable populations: Findings from a longitudinal, multiple case study design in three countries
Source: Research Square preprint supplement (doi:10.21203/rs.3.rs-3593790/v1), 2023-12-12
Supplement: Supplementary file 2 [file 86338e7421fbcab3d5ae9b79.docx]

**Additional file 8**

| **Table 6. Cross-case comparison: Assimilation** | | | |
| --- | --- | --- | --- |
| **Assimilation Scenarios** | **Case 1: ESTHER** | **Case 2: Making Recovery Real** | **Case 3: CMHA Learning Centres** |
| Co-optation | - Co-optation resisted at a number of points (e.g., not participating in national project that required a name change, changing name of Strategy Days to Innovation Days rather than not hold them) | - Resisted co-optation of the approach by the health care sector by intentionally avoiding the term ‘coproduction’, and by not agreeing to proceeding in conditions that didn’t align with the philosophy | - Manitoba Justice ministry has co-opted the Anger Management course, making it mandatory for some criminal offenders, which is contrary to the Recovery College philosophy |
| Loose coupling | - Without dedicated funding and leadership questions about sustainability remain | - NA | - Due to lack of resources, CMHA Central Manitoba branch has been unable to continue coproduction processes during the COVID-19 pandemic, yet still offering pre-existing courses |
| Customization | - NA | - NA | - Name change and expansion of target group, no longer tailored to mental health recovery but to living well for everyone |
| Transformation | - ESTHER mindset considered fully assimilated as a mindset in Jönköping | - Building infrastructure for transformation through i) establishment of a local partnership approach and commitments to priority areas, and ii) continuing to build peer-led services into the system (co-designed and -delivered) - Locally, has influenced the mental health strategy, however political support and/or government direction unknown with upcoming leadership change | - Co-design, -delivery, and co-learning seen as “transformational” by students and staff - Introduction and expansion of coproduction approaches incorporating lived experiences into broader programming design |
