# Supplementary material for: Adopting, implementing, and assimilating heath and social care innovations coproduced with structurally vulnerable populations: Findings from a longitudinal, multiple case study design in three countries
Source: Research Square preprint supplement (doi:10.21203/rs.3.rs-3593790/v1), 2023-12-12
Supplement: Supplementary file 3 [file ad1c056697d4ae14845c3759.docx]

**Additional file 7**

| **Table 5. Cross-case comparison: Implementation** | | | |
| --- | --- | --- | --- |
| **CFIR/DOI element** | **Case 1: ESTHER** | **Case 2: Making Recovery Real** | **Case 3: CMHA Learning Centres** |
| External context | - Development of Esther network and national recognition helped maintain momentum despite other system priorities | - Received local political support, including representation at events - External change agent supported implementation | - Strong community partnerships with other local agencies to promote and co-deliver courses - Peer organization supported with funding - External change agents supported conceptualization, implementation, and evaluation |
| Internal context | - Structures to support Esther input developed | - Led by TSI which held a strong commitment to coproduction approach | - Philosophical alignment with organizational values and culture facilitated implementation |
| Individual characteristics | - ESTHER leaders committed to the philosophy - Bottom-up nature and growth was threatening to senior leadership | - Support available to build local capacity and confidence - Leads motivated by personal or professional experiences | - Passionate staff with lived experiences supported establishing and managing Learning Centres |
| Innovation features | - Philosophy aligned with reason people entered healthcare - Coaches became grassroots change facilitators - Incorporated “serious fun” | - Coproduction via recovery-focused events key to meaningful involvement | - Adaptability to become “something for everyone” - Lived experiences is valued as expertise |
| Process | - Adopted incremental, quality improvement approach to integrating coproduction - ESTHER Cafés attract a broad range of listeners to hear lived experiences and identify improvements | - Worked with the willing, starting with the local integration bodies - Recovery story film became an important tool for documenting and spreading the message | - Shared vision and philosophy to overcome challenges, evolved from consultation with people with lived experience that transformed previous approaches |
