# Supplementary material for: Adopting, implementing, and assimilating heath and social care innovations coproduced with structurally vulnerable populations: Findings from a longitudinal, multiple case study design in three countries
Source: Research Square preprint supplement (doi:10.21203/rs.3.rs-3593790/v1), 2023-12-12
Supplement: Supplementary file 4 [file e1b28129f444c0f7346a70da.docx]

**Additional file 2**

| **Table 3.** **Case features** | | | |
| --- | --- | --- | --- |
| **Case features** | **Case 1 ESTHER** | **Case 2 Making Recovery Real** | **Case 3 CMHA Learning Centre** |
| Structurally vulnerable group | Initially older patients with complex care needs, then expanded to patients of any age with complex needs | Initially, people with lived/living experience of serious mental illness | Initially, people with lived/living experience of serious mental illness but expanded to whole community with interest in living well. |
| Coproduction approach | Initial focus on radical customization of an Esther’s journey through health, and evolved over time to become coproduction with patients through the involvement of Esthers in meetings and projects, to provide feedback based on their experiences | Coproduction is at the heart of initiative from the start. The intention was to bring people with lived/living experience together with health and social service providers in community of Dundee to determine how to make recovery real in this community. Adopted an asset-based approach that discovers capacity within individuals. | Coproduction, co-development, and co-learning are at the heart of the Recovery College model. The aim is to be peer-centric and peer-led and to foster collaborative and authentic relationships with students, so they have meaningful involvement. Social or co-learning is active and involveslooking at topics from both the professional and experiential lenses, interaction with others, learning from their experiences, and contributing to the learning of others. |
| Guiding question(s) | - What is best for, or important to, Esther? - Who needs to cooperate to fulfill this? - What do we need to improve? | What would make recovery real in Dundee? | Provide educational programming to foster recovery and living well |
| Inclusivity principles | - Focus on care coordination in complex needs population - Openness, transparency - Joy, ‘serious fun’ - Driven by value (not money) - Reconnection to original healthcare values - Balancing power | - Rooted in mental health recovery principles (connection, hope and optimism, identity, meaning, empowerment) - Sharing lived experience through recovery stories - Aim is transformational system change within and by communities - Moving beyond the medical model of service delivery | - Rooted in mental health recovery principles - Living well for all - Inclusive educational approach - Courses are open to anyone interested in participating/learning |
| Addressing structural vulnerability | The objective of ESTHER is the coordination of those care needs identified as most important to patients themselves. Vulnerable populations, specifically those with chronic diseases, are those expected to benefit most from ESTHER as these groups are more likely to ‘fall through the cracks’ of the system, given their complex care needs across the health and social care systems. | Collaborative conversation approach to create an environment through sharing recovery stories in which people with lived and professional experience can work together to identify what’s possible. Focus on encouraging involvement from underrepresented communities. | The coproduction approach fosters a fundamental relationship shift between staff and students. The instructional climate creates a sense of community that is absent for many structurally vulnerable individuals. Service providers develop skills in coproduction, wellbeing, and recovery, and become more open to innovation. |
