# Supplementary material for: Adopting, implementing, and assimilating heath and social care innovations coproduced with structurally vulnerable populations: Findings from a longitudinal, multiple case study design in three countries
Source: Research Square preprint supplement (doi:10.21203/rs.3.rs-3593790/v1), 2023-12-12
Supplement: Supplementary file 5 [file e64d433f1f2c085a3be2448f.docx]

**Additional file 6**

| **Table 4.** **Cross-case comparison: Adoption** | | | |
| --- | --- | --- | --- |
| **CFIR/DOI element** | **Case 1: ESTHER** | **Case 2: Making Recovery Real** | **Case 3: CMHA Learning Centres** |
| External context | - Early ESTHER work normalized collaboration between health with social leaders - National awards created enthusiasm to continue to build on work to date | - Health and social care integration legislation fostering collaboration - External change agent shifting toward local coalitions for change created opportunity for mentorship | - Changing policy ideas at the national and regional levels provided philosophical support - Conference promoted recovery, introduced English Recovery College knowledge purveyor - Facilitated by change agent organization, and local and international networks |
| Internal context | - ESTHER had shifted medical relationships to co-leadership - Internal management resistance to patients in decision-making remained | - Tension for change within local mental health service provider collective - Opportunity to influence the new mental health strategy | - Model values well-aligned with organizational culture - Evaluation showed gaps - Culture of innovation and solidarity in the region |
| Individual characteristics | - System leaders realized a focus on value and what is best for the patient leads to the best outcomes | - SRN leader with a vision for change and community development approaches | - Visionary branch leaders also regional leaders in recovery, mental health promotion, and community development - Existing peer staff to support |
| Innovation features | - Flexible philosophy enabled participation of patients (Esthers) in co-producing ongoing innovations | - Opportunity for local network to receive support to centre lived experience in the identification of local needs and solutions | - Recovery college model evolved existing philosophy, aligned with CMHA values, and was adaptable to local context |
| Process | - Initial evaluation showed a 20% reduction in hospital beds - Incremental approach to introducing Esthers to venues of greater strategic importance | - TSI facilitated proposal development, and building trust between partner organizations | - Coproduction processes aligned with aim to be community-led - Agreement between two branches and National Office to move forward in Manitoba |
